# Supplementary material for: Clonal Complexes Distribution of Staphylococcus aureus Isolates from Clinical Samples from the Caribbean Islands
Source: MDPI journal article supplement (doi:10.3390/antibiotics12061050), 2023-06-14
Supplement: s1 [file s1]

[illegible]





[illegible]





[illegible]
