# Supplementary figures and images for: Clonal Complexes Distribution of Staphylococcus aureus Isolates from Clinical Samples from the Caribbean Islands
Source: MDPI journal article supplement (doi:10.3390/antibiotics12061050), 2023-06-14

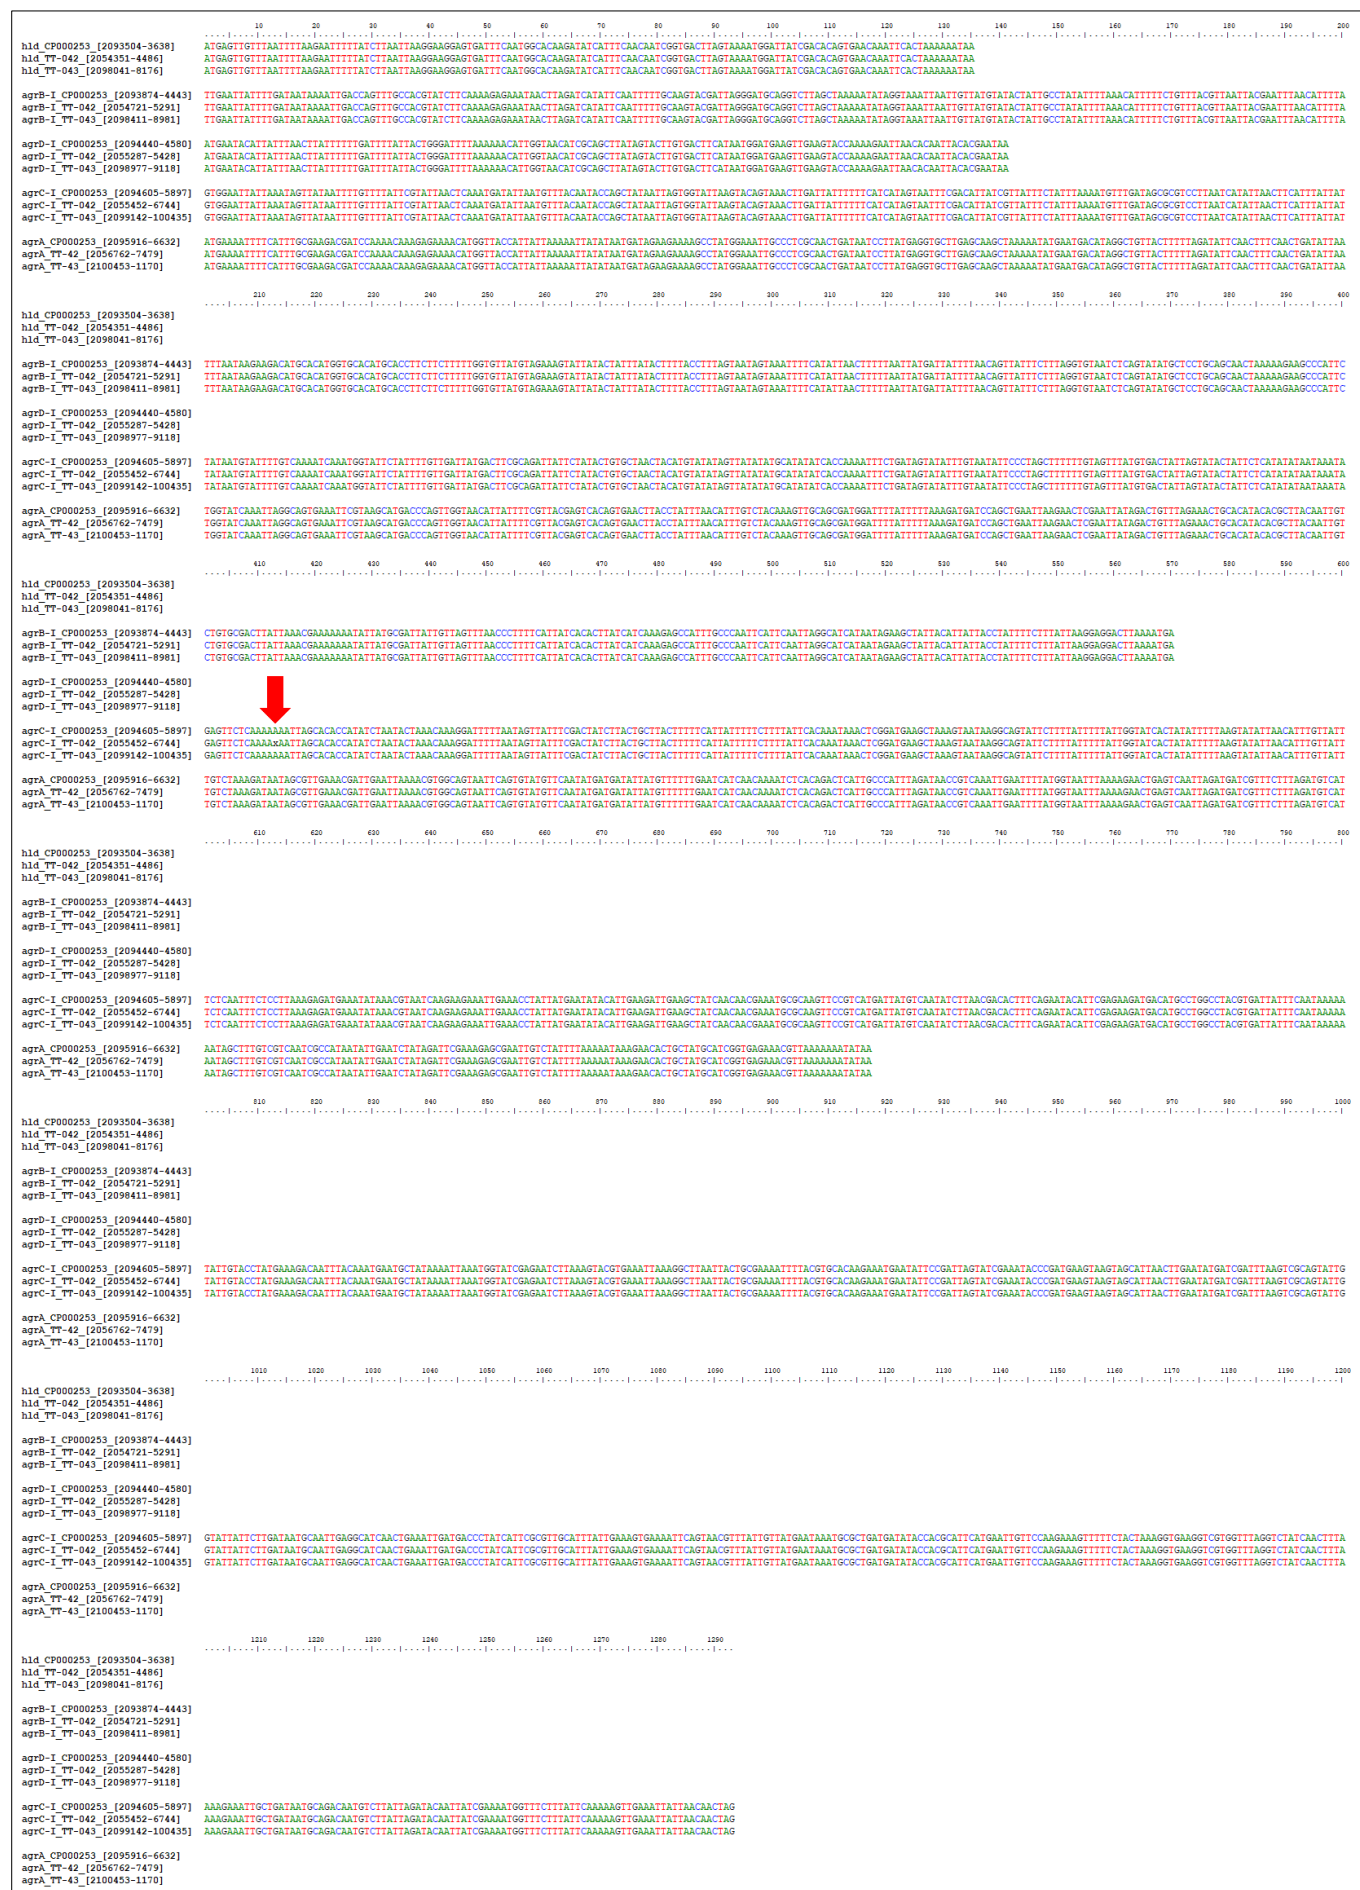

Supplement: s1 [file s1]
